# Supplementary material for: Prediction of human fetal–maternal blood concentration ratio of chemicals
Source: PeerJ. 2020 Jul 21;8:e9562. doi: 10.7717/peerj.9562 (PMC7380269; doi:10.7717/peerj.9562)
Supplement: Table S1 [file peerj-08-9562-s001.xlsx]

## Sheet: Table S1
PubChem CID	nAcid	ALogP	ALogp2	AMR	apol	naAromAtom	nAromBond	nAtom	nHeavyAtom	nH	nB	nC	nN	nO	nS	nP	nF	nCl	nBr	nI	nX	ATS0m	ATS1m	ATS2m	ATS3m	ATS4m	ATS5m	ATS6m	ATS7m	ATS8m	ATS0v	ATS1v	ATS2v	ATS3v	ATS4v	ATS5v	ATS6v	ATS7v	ATS8v	ATS0e	ATS1e	ATS2e	ATS3e	ATS4e	ATS5e	ATS6e	ATS7e	ATS8e	ATS0p
1971	0	-1.8653	3.47934	47.8891	44.0443	9	10	39	21	18	0	14	6	1	0	0	0	0	0	0	0	3471.13	4025.91	5672.71	5616.4	5777.22	5114.32	4518.24	3209.42	2157.3	8165.02	10762.8	15434.9	15986.4	15952.6	15178.7	13712.8	10779	8044.45	301.061	332.183	571.238	713.547	694.779	665.886	612.76	599.929	468.966	54.9508
1978	0	-2.1004	4.41168	67.0727	55.7582	6	6	52	24	28	0	18	2	4	0	0	0	0	0	0	0	4041.47	4144.78	5658.24	6001.34	5918.48	5768.72	5211.77	5038.45	4017.18	9845.84	12274.8	16832.6	18658.9	18332.7	18243.3	17502.7	15694.7	13950.6	397.656	402.33	703.548	925.954	938.031	883.769	906.353	896.067	737.278	67.6422
2476	0	0.8142	0.662922	132.671	82.6865	0	0	75	34	41	0	29	1	4	0	0	0	0	0	0	0	5445.39	6634.32	11222.3	15243.9	16326.5	15322	14375.9	10825.4	8021.14	14665.3	20547.2	34909.2	48651.8	56728.7	56131.4	52695.9	45650.1	35061.3	557.74	616.801	1207.64	1823.8	2576.67	2880.22	2712.61	2611.51	2247.04	102.89
5993	0	4.2426	17.9997	78.1776	39.0408	0	0	24	18	6	0	10	0	0	0	0	0	8	0	0	8	11502.4	5210.13	11759.7	23504.1	18749.6	12442.5	6533.65	0	0	8453.44	9466.59	18330.9	24244	17715	10334.8	3395.98	0	0	212.321	209.531	443.947	689.204	580.201	354.698	123.429	0	0	68.5759
2730	0	3.5281	12.4475	56.314	39.7507	6	6	29	18	11	0	9	1	3	1	1	0	3	0	0	3	8030.98	5668.77	7980.31	9548.87	9285.32	8821.13	6703.43	5345.8	2580.16	7751.53	8414.25	11322.9	12259.6	11824.2	11349.2	10463.3	9517.62	6415.98	243.32	234.813	418.519	438.149	398.255	418.351	390.957	441.995	358.78	68.9746
2786	0	-0.9131	0.833752	102.47	64.9742	0	0	60	27	33	0	18	2	5	1	0	0	1	0	0	1	6587.06	5623.41	8527.09	10477.2	10628	10681	10629.9	9292.37	6597.08	11318.4	14478.5	22135.5	26700	27550.9	26876.9	26039.5	24340.9	20999.3	465.42	478.51	904.44	1288.91	1487.73	1445.18	1413.22	1345.66	1285.13	83.6708
2802	0	0.4622	0.213629	28.1122	40.9539	12	12	32	22	10	0	15	3	3	0	0	0	1	0	0	1	4787.32	4194.38	6242.24	7470.93	6984.81	6729.7	6745.29	5291.91	3243.79	8546.68	10301	15163.2	18071.7	16972	16306.7	14840.5	10901.8	5674.89	263.028	272.217	439.038	585.575	601.246	551.264	583.316	499.605	345.999	56.5916
3035	0	2.7413	7.51473	30.6431	38.6943	12	12	26	18	8	0	14	0	0	0	0	0	4	0	0	4	7054.64	3963.98	6746.17	6392.21	6666.74	6472.72	5044.08	7460.44	2042.85	8193.79	9118.63	13158.6	14239	13468.9	12663.6	10045.5	7183.44	3355.43	207.617	208.218	326.482	417.323	406.246	398.723	349.476	255.793	137.083	61.6111
3016	0	-0.0956	0.00913936	29.9189	42.0103	12	12	33	20	13	0	16	2	1	0	0	0	1	0	0	1	4226.5	3780.5	5599.4	6629.99	6050.34	5958.24	5421.87	3616.73	1231.24	8387.35	10214.1	14900.5	17918.7	17297.4	16508.7	14161.4	9653.39	4352.95	253.819	269.067	448.15	583.414	608.681	636.196	587.817	464.198	281.115	58.218
3043	0	-2.399	5.7552	38.985	32.4075	5	5	29	17	12	0	10	4	3	0	0	0	0	0	0	0	3007.52	3299.7	4925.8	4794.09	4291.35	2947.2	2619.57	1947.29	958.572	6230.6	7957.46	11979.2	12035.4	10993	8909.87	7326.3	5333.16	2867.01	236.888	253.241	453.003	563.539	523.923	462.666	378.261	303.711	201.168	39.994
3279	0	-2.2892	5.24044	54.9944	37.407	0	0	38	14	24	0	10	2	2	0	0	0	0	0	0	0	2371.35	2369.76	2808.18	3118.75	2677.04	2112.73	1797.76	1590.02	1709.01	5900.59	7486.81	9967.05	11044.4	10881	9224.46	7127.4	6389.72	6549.5	283.755	285.787	513.879	691.722	713.761	719.137	572.017	418.092	381.794	42.2661
37497	0	0.3962	0.156974	56.9898	51.5922	6	6	48	20	28	0	17	2	1	0	0	0	0	0	0	0	3129.3	3394.06	4584.28	5427.64	5494.49	5078.65	4203.89	3561.21	2742.3	8773.15	11021.9	15249.7	18088.5	19780.8	19737.4	17357.3	15614	14296.2	350.061	359.91	643.686	819.634	949.289	1086.94	1100.12	875.522	785.14	62.9237
3356	0	-0.0352	0.00123904	57.8304	51.2039	6	6	48	28	20	0	17	2	3	0	0	6	0	0	0	6	5798.74	5268.77	8783.08	7534.04	6675.28	7862.03	8096.54	8112.04	7835.27	10019.5	12609.1	18087.2	18964.7	17955.1	18446.5	18362.4	16877.2	15681.5	419.016	401.399	762.386	965.734	847.466	863.385	896.937	842.667	786.113	62.5147
5281881	0	1.3202	1.74293	67.5842	64.7228	12	12	55	30	25	0	23	2	1	1	0	3	0	0	0	3	6102.5	5992.55	9470.75	9828.33	8856.4	8081.68	8861.99	7379.05	7460.79	12348.9	15785.3	23769.9	27736.4	27239.9	25166.2	23095.6	21128.2	20823	431.892	450.495	823.459	1051.81	1157.44	1166.76	1045.09	950.805	945.914	87.664
8370	0	4.4658	19.9434	33.6936	23.64	6	6	12	12	0	0	6	0	0	0	0	0	6	0	0	6	8405.8	3420.32	5975.06	13082.5	10095	3770.11	0	0	0	5564.93	5313.08	8085.05	9838.33	5795.8	1511.91	0	0	0	117.697	102.497	159.751	209.583	129.708	36.2269	0	0	0	45.2478
13930	0	3.0382	9.23066	73.1272	36.996	0	0	23	18	5	0	10	0	1	0	0	0	7	0	0	7	10500.6	5156.56	11263.7	22234	18876.5	10957.5	2038.27	0	0	8134.78	9495.32	17790.7	23133.9	17204.4	8949.14	1585.17	0	0	206.879	212.939	433.911	647.94	542.568	319.598	78.8165	0	0	64.0221
3877	0	-1.1353	1.28891	53.183	30.0207	0	0	26	15	11	0	8	3	3	1	0	0	0	0	0	0	3549.63	3266.51	4945.08	4494.72	3935.31	3251.34	2040.74	1672.84	553.175	5705.95	7010.36	10077.4	10074.2	8983.53	7184.83	5057.15	3705.41	2025.37	213.631	222.132	383.432	449.498	421.937	388.352	243.092	231.817	152.251	41.1716
3676	0	1.166	1.35956	45.8867	42.3114	6	6	39	17	22	0	14	2	1	0	0	0	0	0	0	0	2690.41	2888.63	3860.13	4192.94	3890.22	3505.89	2493.39	2256.66	1991.5	7316.1	9062.9	12358.7	14228.5	14405.2	12713.3	9761.75	8815.32	9432.71	287.128	294.582	515.405	625.457	715.831	774.473	638.711	443.765	410.297	51.8893
4173	0	0.2875	0.0826563	24.6757	22.2671	5	5	21	12	9	0	6	3	3	0	0	0	0	0	0	0	2231.22	2195.56	2999.99	2875.3	2729.34	1896.77	798.295	36.3182	0	4199.97	4958.16	6844.31	6949.89	6926.38	4701.4	2233.05	288.362	0	176.369	175.034	288.073	321.585	333.947	324.461	243.84	45.8162	0	26.2945
4196	0	2.0036	4.01441	106.91	77.0818	6	6	67	32	35	0	29	1	2	0	0	0	0	0	0	0	4927.35	5789	9124.04	11101.3	10903	10674.3	10236.7	9321.89	7630.27	14046	18680.6	30216.2	39188.5	42594.4	42535.3	40351.7	36294.1	29436.9	490.726	531.607	998.872	1426.81	1793.6	1981.36	1880.66	1780.15	1541.98	98.936
4463	0	-0.606	0.367236	25.0627	40.9371	12	12	34	20	14	0	15	4	1	0	0	0	0	0	0	0	3218.94	3753.25	5293.4	6623.71	6887.69	6134.13	3645.65	1306.55	195.917	7977.57	10276.1	14381.5	17509.5	18291.2	18711	14179.3	7547.37	2414.49	261.324	287.805	481.369	609.083	661.395	714.723	673.268	516.258	274.327	53.5413
4485	0	0.8579	0.735992	63.1317	48.9343	6	6	43	25	18	0	17	2	6	0	0	0	0	0	0	0	4398.98	4489.8	6443.12	7783.53	9366.22	9647	9854.98	7522.98	2252.38	9544.27	11628.6	16754.1	21011	24325.4	25681.3	24394.5	19067.9	10417.6	349.635	352.244	591.458	680.366	935.712	1046.69	1101.8	1151.05	802.566	61.6936
19520	0	4.6809	21.9108	82.7393	40.554	0	0	24	19	5	0	10	0	0	0	0	0	9	0	0	9	12758	5623.81	12621.7	26035.5	22502	17740.1	7754.62	0	0	8926.33	9813.85	19119.5	25852.8	19702.6	12197.3	3774.79	0	0	217.678	211.956	451.085	704.124	598.19	369.397	126.497	0	0	72.8837
4834	0	-2.3517	5.53049	96.2724	71.8306	6	6	62	36	26	0	23	5	7	1	0	0	0	0	0	0	7145.09	7073.69	11354.3	12593.5	13358.4	11481.2	9989.23	11192.5	11770.1	13877.1	17425.1	26315.3	31528.2	31522.1	27439.8	25599.4	27566.9	28330.4	501.326	516.066	925.548	1252.49	1426.14	1381.63	1142.76	1094.7	1194.8	94.6671
4946	0	-1.0098	1.0197	35.5013	44.8667	10	11	40	19	21	0	16	1	2	0	0	0	0	0	0	0	3037.7	3337.21	4536.47	4676.58	3954.34	3604.36	3075.93	2688.42	2254.59	8105.12	10251.9	14412.4	15537.8	13911.9	12589.8	11232.5	9604.97	8430.03	298.641	313.736	539.855	715.44	714.4	624.693	611.396	572.764	407.321	56.4557
60815	0	-1.3044	1.70146	71.5762	60.0802	6	6	55	27	28	0	20	2	5	0	0	0	0	0	0	0	4585.96	4857.54	6862.02	8207.87	9007.06	9754.05	8310.58	5622.76	4062.35	10909.3	13610.5	19485.8	24180.5	27549.4	30021.4	28617.6	22390.6	15864.9	426.089	435.263	788.944	1024.45	1222.45	1373.04	1532.39	1419.98	1035.86	73.8632
5155	0	-0.4112	0.169085	54.5163	31.0095	0	0	28	16	12	0	10	2	4	0	0	0	0	0	0	0	2871.1	2963.18	4435.55	4455.4	3877.53	2915.11	2279.31	1626.55	761.12	5960.37	7399.66	10758.6	11333.7	9960.44	8225.09	6719.91	4641.69	2520.86	229.837	235.733	411.511	503.885	512.941	399.4	363.432	278.441	193.672	38.2172
5471	2	-0.3006	0.0903604	72.1213	49.8807	5	5	41	25	16	0	15	2	6	2	0	0	0	0	0	0	6164.11	5469.4	8746.29	8605.06	10387.3	8667.21	5561.47	6875.58	6347.34	9828.62	12257.2	18611.6	20853.9	21207.3	17624	13828.7	13380.4	12399.4	338.604	346.773	593.955	793.876	932.715	873.345	686.227	538.934	506.04	72.0465
3121	1	-0.3467	0.120201	37.3651	26.3527	0	0	26	10	16	0	8	0	2	0	0	0	0	0	0	0	1682.31	1591.91	1975.09	2009.68	1906.69	1470.85	503.394	90.9317	9.14458	4318.26	5373.14	7080.46	7612.49	7161.58	5797.77	3406.19	1247.93	279.754	194.523	189.087	338.446	452.976	451.283	408.506	340.975	163.638	60.4662	30.7114
5726	0	-3.796	14.4096	55.4138	34.9763	0	0	32	19	13	0	10	5	4	0	0	0	0	0	0	0	3460.7	3535.91	5175.81	5621.55	5331.05	4392.82	3721.45	2949.57	1980.82	6721.39	8322.04	12312.5	13861.9	12930.8	11279.1	9354.95	7155.68	4620.95	267.16	272.025	477.257	630.83	667.59	580.473	502.556	398.631	294.922	42.2918
148192	0	1.1029	1.21639	115.309	113.767	18	19	103	51	52	0	38	6	7	0	0	0	0	0	0	0	8503.82	9034.38	13031.7	14545	15592.5	17343.4	16803.4	17450	18414	20684.6	25874	37521.8	45455.3	47590.4	49241	52662.2	56989.5	59365.8	790.572	815.396	1423.15	1914.23	2544.36	2391.77	2520.7	2666.81	3215.24	140.86
2803	0	0.8181	0.669288	31.6685	29.5011	6	6	23	14	9	0	9	3	0	0	0	0	2	0	0	2	4409.51	2983.84	4491.08	4776.95	4706.68	3581.11	2878.83	762.059	81.7871	5829.29	6791.76	9689.96	9278.28	7715.74	6358.75	6075.45	3576	968.173	183.087	190.874	317.921	381.217	293.778	247.845	222.015	209.662	103.172	42.2364
3017	0	2.5182	6.34133	58.9809	46.2587	6	6	40	19	21	0	12	2	3	1	1	0	0	0	0	0	4900.02	5137.47	6642.94	6521.82	6791.97	5753.79	5321.19	3866.71	2288.73	8064.32	9664.68	12796.2	13985.9	14741.1	14759.3	14120.8	12554	9858.26	307.101	309.985	564.721	608.849	635.622	625.263	642.005	754.781	570.693	68.7402
3114	0	-0.6198	0.384152	52.5146	60.399	12	12	54	25	29	0	21	3	1	0	0	0	0	0	0	0	3903.57	4297.74	6119.23	7269.36	8167.98	8017.48	7548.03	7079.75	4584.13	10741.6	13547.4	19614.5	24497.8	27969.7	29053.2	27019.1	25398.3	22095.2	397.143	414.662	723.148	988.716	1200.09	1475.17	1474.01	1153.39	1224.63	75.7339
3715	1	0.2922	0.0853808	37.8739	50.5967	15	16	41	25	16	0	19	1	4	0	0	0	1	0	0	1	5234.05	4685.81	7062.11	7708.09	7573.08	7661.19	7159.09	6193.49	5110.48	10157	12365	18064.3	20864	21421	21052.4	19850.8	16737.7	13134.2	326.449	337.989	558.674	683.68	767.52	827.009	829.245	749.548	637.443	68.6381
3817	0	-1.5929	2.53733	97.3382	105.536	18	18	94	46	48	0	37	4	5	0	0	0	0	0	0	0	7451.17	8163.3	11578.6	13010.2	13343.1	14364.2	14633.9	14750.2	15557.6	19217.4	24496.4	35520	41706.1	43290	45621.1	47359.9	48670.8	51520.2	709.05	743.001	1315.8	1825.11	2114.49	2174.67	2440.43	2371.54	2448.78	132.587
4171	0	-0.7944	0.631071	51.9811	46.5758	6	6	44	19	25	0	15	1	3	0	0	0	0	0	0	0	3153.46	3337.17	4237.3	4197.35	3590.21	3685.13	3176.23	2451.31	2248.05	8022.33	10045.8	13586.6	14579.8	13463.7	12555.6	11325	9291.7	8219.19	331.326	339.653	600.675	748.881	781.115	700.431	644.657	598.335	414.627	56.0884
114976	0	-0.2987	0.0892217	89.7702	71.6458	6	6	65	30	35	0	25	1	4	0	0	0	0	0	0	0	4862.23	5818.39	10312.5	14019.6	14539.8	12811.9	11255.9	7282.62	4316.16	12784.7	17815.9	31364.9	44210.8	50149.2	46348.4	40210.1	32051.3	21572.1	487.268	536.324	1053.7	1627.83	2315.13	2520.78	2178.62	1973.68	1626.4	89.0668
4631	0	-0.4448	0.197847	51.9798	45.2422	6	6	42	19	23	0	15	1	3	0	0	0	0	0	0	0	3151.43	3312.96	4281.67	4449.25	3839.76	3962.92	3744.99	2829.5	2336.04	7960.17	9816.32	13005.7	13700.5	12954.6	13270.5	12830.8	10627.6	8993.39	317.889	325.417	557.093	714.643	710.851	643.009	687.382	675.871	473.001	55.1992
33772	0	3.6423	13.2663	78.1321	38.5092	0	0	23	19	4	0	10	0	1	0	0	0	8	0	0	8	11756.3	5570.25	12642.1	24351.8	19773.3	14640.5	6922.14	0	0	8607.66	9842.58	18733.4	24395.4	18087.1	10748.5	3100.41	0	0	212.236	215.363	441.987	660.435	551.995	333.009	91.0902	0	0	68.3299
4913	0	-0.6429	0.41332	43.967	40.9847	6	6	38	17	21	0	13	3	1	0	0	0	0	0	0	0	2741.33	2904.52	3764.01	3890.16	3283.91	2676.11	2521.41	2298.4	1916.28	7104.81	8790.12	11882.3	13130.6	12231.8	10213.6	8579.73	7960.45	7580.81	283.071	291.017	498.778	630.128	662.334	680.627	519.681	419.561	364.707	49.8658
[truncated: 1,396 more columns]
