# Supplementary material for: Prediction of human fetal–maternal blood concentration ratio of chemicals
Source: PeerJ. 2020 Jul 21;8:e9562. doi: 10.7717/peerj.9562 (PMC7380269; doi:10.7717/peerj.9562)
Supplement: Table S2 [file peerj-08-9562-s002.xlsx]

## Sheet: Table S2
PubChem CID	nAcid	ALogP	ALogp2	AMR	apol	naAromAtom	nAromBond	nAtom	nHeavyAtom	nH	nB	nC	nN	nO	nS	nP	nF	nCl	nBr	nI	nX	ATS0m	ATS1m	ATS2m	ATS3m	ATS4m	ATS5m	ATS6m	ATS7m	ATS8m	ATS0v	ATS1v	ATS2v	ATS3v	ATS4v	ATS5v	ATS6v	ATS7v	ATS8v	ATS0e	ATS1e	ATS2e	ATS3e	ATS4e	ATS5e	ATS6e	ATS7e	ATS8e	ATS0p
3653	0	-0.092	0.008464	116.064	77.3997	0	0	71	31	40	0	27	0	4	0	0	0	0	0	0	0	4959.65	5628.76	9072.79	11439	11612.7	10489.5	8565.79	7490.78	6836.09	13543.9	18385.1	30044.5	39900.3	44277.7	41379.2	34519.5	29582	26491.9	525.739	553.55	1094.49	1668.62	2090.64	2352.37	2085.44	1651.33	1498.29	95.6576
10917	0	-2.5189	6.34486	37.2555	25.8279	0	0	26	11	15	0	7	1	3	0	0	0	0	0	0	0	1989.19	1867.86	2638.55	2178.38	2383.86	1349.97	1289.38	290.286	0	4323.36	5151.11	7549.65	8640.68	7331.4	5304.68	3688.27	1476.25	0	203.817	196.924	361.082	483.051	614.887	376.614	305.661	170.481	0	29.3311
44187	3	-2.0165	4.06627	118.263	84.1194	11	11	71	44	27	0	25	9	8	2	0	0	0	0	0	0	9503.23	9149.45	13741.6	15919.4	16164.1	16386.1	14735.3	16568.9	16230.3	16541.7	20475.6	29948.8	35518.1	36462.8	34472	33534	35882.1	35895.7	586.028	611.082	1040.41	1326.23	1534.44	1553.43	1421.78	1407.42	1529.65	114.583
2719	0	0.479	0.229441	51.6266	54.4966	10	11	48	22	26	0	18	3	0	0	0	0	1	0	0	1	4468.46	4084.21	5693.75	6025.03	5581.13	4854.8	4544.7	3665.06	3472.29	9665.4	12017.2	17018.8	19372.8	19174.3	18085.6	16166.4	14229.7	12354	353.09	370.265	659.045	863.782	913.138	977.048	905.55	778.784	724.203	70.1425
7430	0	1.3988	1.95664	19.3433	21.3912	6	6	16	12	4	0	6	2	2	0	0	0	2	0	0	2	4287.38	2554.29	3955.65	4767.22	4515.85	2948.93	476.434	64.508	0	4592.79	4969.44	7214.48	7655.99	5703.39	2773.84	632.848	328.055	0	143.375	136.004	201.339	249.721	250.931	140.184	39.8994	37.8847	0	31.7231
3706	0	-0.886	0.784996	100.08	103.407	18	18	92	45	47	0	36	5	4	0	0	0	0	0	0	0	7246.12	8129.33	11903.8	12768.3	12951.2	14072.5	14148.9	14203.7	14951.8	18789.7	24310.7	36640.7	42943.7	43061	43972.1	46440.2	49129.5	50335.3	691.641	735.779	1324.73	1885.05	2224.76	2110.92	2254.05	2374.93	2513.62	129.92
3767	0	-1.2303	1.51364	12.7256	19.3296	6	6	17	10	7	0	6	3	1	0	0	0	0	0	0	0	1717.25	1705.18	2111.16	2040.04	1441.37	922.207	293.078	32.3024	0	3705.02	4346.5	5626.4	5455.41	3922.03	2439.44	1149.66	298.267	0	136.229	137.557	199.967	228.18	202.977	161.051	103.819	43.4316	0	24.1189
4425	0	-0.8484	0.719783	64.5263	51.7507	6	6	45	24	21	0	19	1	4	0	0	0	0	0	0	0	3982.42	4613.11	7764.42	10313.8	10241.7	7743.42	5802.21	2599.89	1463.44	9808.46	13291	22378.6	29755.1	31950.7	26655.4	19151.3	11542.4	5901.95	347.966	381.469	719.106	1099.99	1370.08	1378.1	1072.39	792.266	419.909	66.1088
4451	0	-0.5553	0.308358	104.746	95.7337	12	12	85	40	45	0	32	3	4	1	0	0	0	0	0	0	7302.48	7601.27	11290.8	12812.3	12812	12809.1	13550.7	14929.7	15197.8	17143.6	22211.1	33590.7	40396.2	40103.1	38934.8	41901.9	46734.1	47428	636.383	671.309	1219.78	1772.52	2107.26	1991.69	1933.66	2212.13	2456.42	123.865
6809	0	-0.7583	0.575019	12.383	20.118	6	6	16	11	5	0	8	1	2	0	0	0	0	0	0	0	1867.33	1937.46	2876.98	2679.9	1833.22	528.551	34.2861	0	0	4219.65	5181.53	7512.45	7057.13	4463.86	1659.64	226.195	0	0	130.822	134.683	215.073	255.038	206.223	123.136	32.3793	0	0	27.0307
5253	0	-1.7015	2.8951	46.0083	41.9619	6	6	38	18	20	0	12	2	3	1	0	0	0	0	0	0	3939.63	4249.7	4942.71	4574.76	4370.6	3840.17	2879.57	2754.86	2567.49	7436.46	9309.91	12925.9	13923.3	13057.6	11820.2	9661.24	8127.92	6998.04	294.058	297.954	523.493	686.067	678.527	643.847	555.878	428.564	419.82	55.1187
2474	0	-0.8602	0.739944	54.5476	53.3522	6	6	49	21	28	0	18	2	1	0	0	0	0	0	0	0	3273.56	3682.59	5086.67	5695.03	5381.35	5056.47	4549.79	4122.33	2971.29	9196.67	11868.9	17115.4	19811.5	19652.3	18625	17493	17099.3	15298.4	357.601	374.991	688.858	924.064	1014.56	1014.96	949.264	873.873	879.124	65.7126
60835	0	-0.2084	0.0434306	29.431	49.1511	15	16	40	21	19	0	18	1	1	1	0	0	0	0	0	0	4096.07	4175.49	5741.15	5672.21	5487.93	5476.14	5612.2	5010.61	3192.25	9270.38	11605	16493.3	16994.5	16628.4	16872	17292.9	16613.3	12752.4	295.677	318.434	537.691	674.23	671.932	678.062	685.08	676.95	632.546	68.911
4192	0	0.9703	0.941482	26.4133	46.3853	17	18	36	23	13	0	18	3	0	0	0	1	1	0	0	2	4816.19	4441.53	6793.17	7812.09	7612.76	7620.95	7021.3	6160.25	2520.19	9438.35	11674.3	17345.9	20476.6	20647.1	20306.8	18282.5	13304.7	7403.3	281.75	302.639	506.456	648.172	695.19	685.152	760.506	572.833	376.383	64.6728
[truncated: 1,396 more columns]
